# Supplementary material for: Structural and Phylogenetic Analysis of SARS-CoV-2 Spike Glycoprotein from the Most Widespread Variants
Source: MDPI journal article supplement (doi:10.3390/life12081245), 2022-08-16
Supplement: s1 [file s1]

|                   |                                                              |    |
|-------------------|--------------------------------------------------------------|----|
| wild type         | MFVFLVLLPLVSSQCVNLTTRTQLPPAYTNSFTRGVYYPDKVFRSSVLHSTQDLFLPFFS | 60 |
| DELTA             | MFVFLVLLPLVSSQCVNLTTRTQLPPAYTNSFTRGVYYPDKVFRSSVLHSTQDLFLPFFS | 60 |
| LAMBDA            | MFVFLVLLPLVSSQCVNLTTRTQLPPAYTNSFTRGVYYPDKVFRSSVLHSTQDLFLPFFS | 60 |
| MU                | MFVFLVLLPLVSSQCVNLTTRTQLPPAYTNSFTRGVYYPDKVFRSSVLHSTQDLFLPFFS | 60 |
| BETA              | MFVFLVLLPLVSSQCVNLTTRTQLPPAYTNSFTRGVYYPDKVFRSSVLHSTQDLFLPFFS | 60 |
| GAMMA             | MFVFLVLLPLVSSQCVNLTTRTQLPSAYTNSFTRGVYYPDKVFRSSVLHSTQDLFLPFFS | 60 |
| B.1.1.318         | MFVFLVLLPLVSSQCVNLTTRTQLPPAYTNSFTRGVYYPDKVFRSSVLHSTQDLFLPFFS | 60 |
| KAPPA             | MFVFLVLLPLVSSQCVNLTTRTQLPPAYTNSFTRGVYYPDKVFRSSVLHSTQDLFLPFFS | 60 |
| A 23.1            | MFVFLVLLPLVSSQCVNLTTRTQLPPAYTNSFTRGVYYPDKVFRSSVLHSTQDLFLPFFS | 60 |
| IOTA              | MFVFLVLLPLVSSQCVNLTTRTQLPPAYTNSFTRGVYYPDKVFRSSVLHSTQDLFLPFFS | 60 |
| THETA             | MFVFLVLLPLVSSQCVNLTTRTQLPPAYTNSFTRGVYYPDKVFRSSVLHSTQDLFLPFFS | 60 |
| EPSILON           | MFVFLVLLPLVSSQCVNLTTRTQLPPAYTNSFTRGVYYPDKVFRSSVLHSTQDLFLPFFS | 60 |
| 20 A.EU1          | MFVFLVLLPLVSSQCVNLTTRTQLPPAYTNSFTRGVYYPDKVFRSSVLHSTQDLFLPFFS | 60 |
| 20 A.EU2          | MFVFLVLLPLVSSQCVNLTTRTQLPPAYTNSFTRGVYYPDKVFRSSVLHSTQDLFLPFFS | 60 |
| ZETA              | MFVFLVLLPLVSSQCVNLTTRTQLPPAYTNSFTRGVYYPDKVFRSSVLHSTQDLFLPFFS | 60 |
| ALPHA             | MFVFLVLLPLVSSQCVNLTTRTQLPPAYTNSFTRGVYYPDKVFRSSVLHSTQDLFLPFFS | 60 |
| ETA               | MFVFLVLLPLVSSQCVNLTTRTQLPPAYTNSFTRGVYYPDKVFRSSVLHSTQDLFLPFFS | 60 |
| Omicron BA.1      | MFVFLVLLPLVSSQCVNLTTRTQLPPAYTNSFTRGVYYPDKVFRSSVLHSTQDLFLPFFS | 60 |
| Omicron BA.2      | MFVFLVLLPLVSSQCVNLTTRTQLPPAYTNSFTRGVYYPDKVFRSSVLHSTQDLFLPFFS | 60 |
| Omicron BA.2.12.1 | MFVFLVLLPLVSSQCVNLTTRTQLPPAYTNSFTRGVYYPDKVFRSSVLHSTQDLFLPFFS | 60 |
| Omicron BA.4      | MFVFLVLLPLVSSQCVNLTTRTQLPPAYTNSFTRGVYYPDKVFRSSVLHSTQDLFLPFFS | 60 |
| Omicron BA.5      | MFVFLVLLPLVSSQCVNLTTRTQLPPAYTNSFTRGVYYPDKVFRSSVLHSTQDLFLPFFS | 60 |
|                   | ***:***** ***: .*** :*****:*****                             |    |

|                   |                                                           |     |
|-------------------|-----------------------------------------------------------|-----|
| wild type         | NVTWFHAIHVSNGTKRFDNPVLPFNDGVYFASTEKSNIIRGWIFGTTLDSKTQSLIV | 120 |
| DELTA             | NVTWFHAIHVSNGTKRFDNPVLPFNDGVYFASTEKSNIIRGWIFGTTLDSKTQSLIV | 120 |
| LAMBDA            | NVTWFHAIHVSNGTKRFDNPVLPFNDGVYFASTEKSNIIRGWIFGTTLDSKTQSLIV | 120 |
| MU                | NVTWFHAIHVSNGTKRFDNPVLPFNDGVYFASTEKSNIIRGWIFGTTLDSKTQSLIV | 120 |
| BETA              | NVTWFHAIHVSNGTKRFDNPVLPFNDGVYFASTEKSNIIRGWIFGTTLDSKTQSLIV | 120 |
| GAMMA             | NVTWFHAIHVSNGTKRFDNPVLPFNDGVYFASTEKSNIIRGWIFGTTLDSKTQSLIV | 120 |
| B.1.1.318         | NVTWFHAIHVSNGTKRFDNPVLPFNDGVYFASTEKSNIIRGWIFGTTLDSKTQSLIV | 120 |
| KAPPA             | NVTWFHAIHVSNGTKRFDNPVLPFNDGVYFASTEKSNIIRGWIFGTTLDSKTQSLIV | 120 |
| A 23.1            | NVTWFHAIHVSNGTKRFDNPVLPFNDGVYFASTEKSNIIRGWIFGTTLDSKTQSLIV | 120 |
| IOTA              | NVTWFHAIHVSNGTKRFDNPVLPFNDGVYFASTEKSNIIRGWIFGTTLDSKTQSLIV | 120 |
| THETA             | NVTWFHAIHVSNGTKRFDNPVLPFNDGVYFASTEKSNIIRGWIFGTTLDSKTQSLIV | 120 |
| EPSILON           | NVTWFHAIHVSNGTKRFDNPVLPFNDGVYFASTEKSNIIRGWIFGTTLDSKTQSLIV | 120 |
| 20 A.EU1          | NVTWFHAIHVSNGTKRFDNPVLPFNDGVYFASTEKSNIIRGWIFGTTLDSKTQSLIV | 120 |
| 20 A.EU2          | NVTWFHAIHVSNGTKRFDNPVLPFNDGVYFASTEKSNIIRGWIFGTTLDSKTQSLIV | 120 |
| ZETA              | NVTWFHAIHVSNGTKRFDNPVLPFNDGVYFASTEKSNIIRGWIFGTTLDSKTQSLIV | 120 |
| ALPHA             | NVTWFHAIHVSNGTKRFDNPVLPFNDGVYFASTEKSNIIRGWIFGTTLDSKTQSLIV | 118 |
| ETA               | NVTWFHAIHVSNGTKRFDNPVLPFNDGVYFASTEKSNIIRGWIFGTTLDSKTQSLIV | 118 |
| Omicron BA.1      | NVTWFHAIHVSNGTKRFDNPVLPFNDGVYFASTEKSNIIRGWIFGTTLDSKTQSLIV | 118 |
| Omicron BA.2      | NVTWFHAIHVSNGTKRFDNPVLPFNDGVYFASTEKSNIIRGWIFGTTLDSKTQSLIV | 117 |
| Omicron BA.2.12.1 | NVTWFHAIHVSNGTKRFDNPVLPFNDGVYFASTEKSNIIRGWIFGTTLDSKTQSLIV | 117 |
| Omicron BA.4      | NVTWFHAIHVSNGTKRFDNPVLPFNDGVYFASTEKSNIIRGWIFGTTLDSKTQSLIV | 115 |
| Omicron BA.5      | NVTWFHAIHVSNGTKRFDNPVLPFNDGVYFASTEKSNIIRGWIFGTTLDSKTQSLIV | 115 |
|                   | *****.*** *** ***** *****                                 |     |

|                   |                                                              |     |
|-------------------|--------------------------------------------------------------|-----|
| wild type         | NNATNVVIKVCFFQFCNDPFLGVY-YHKNNKSWMESEFRVYSSANNCTFEYVSQPFLMDL | 179 |
| DELTA             | NNATNVVIKVCFFQFCNDPFLDVY-YHKNNKSWMESEFRVYSSANNCTFEYVSQPFLMDL | 177 |
| LAMBDA            | NNATNVVIKVCFFQFCNDPFLGVY-YHKNNKSWMESEFRVYSSANNCTFEYVSQPFLMDL | 179 |
| MU                | NNATNVVIKVCFFQFCNDPFLGVY-YHKNNKSWMESEFRVYSSANNCTFEYVSQPFLMDL | 180 |
| BETA              | NNATNVVIKVCFFQFCNDPFLGVY-YHKNNKSWMESEFRVYSSANNCTFEYVSQPFLMDL | 179 |
| GAMMA             | NNATNVVIKVCFFQFCNDPFLGVY-YHKNNKSWMESEFRVYSSANNCTFEYVSQPFLMDL | 179 |
| B.1.1.318         | NNATNVVIKVCFFQFCNDPFLGVY-YHKNNKSWMESEFRVYSSANNCTFEYVSQPFLMDL | 178 |
| KAPPA             | NNATNVVIKVCFFQFCNDPFLGVY-YHKNNKSWMESEFRVYSSANNCTFEYVSQPFLMDL | 179 |
| A 23.1            | NNATNVVIKVCFFQFCNDPFLGVY-YHKNNKSWMESEFRVYSSANNCTFEYVSQPFLMDL | 179 |
| IOTA              | NNATNVVIKVCFFQFCNDPFLGVY-YHKNNKSWMESEFRVYSSANNCTFEYVSQPFLMDL | 179 |
| THETA             | NNATNVVIKVCFFQFCNDPFLGVY-YHKNNKSWMESEFRVYSSANNCTFEYVSQPFLMDL | 179 |
| EPSILON           | NNATNVVIKVCFFQFCNDPFLGVY-YHKNNKSWMESEFRVYSSANNCTFEYVSQPFLMDL | 179 |
| 20 A.EU1          | NNATNVVIKVCFFQFCNDPFLGVY-YHKNNKSWMESEFRVYSSANNCTFEYVSQPFLMDL | 179 |
| 20 A.EU2          | NNATNVVIKVCFFQFCNDPFLGVY-YHKNNKSWMESEFRVYSSANNCTFEYVSQPFLMDL | 179 |
| ZETA              | NNATNVVIKVCFFQFCNDPFLGVY-YHKNNKSWMESEFRVYSSANNCTFEYVSQPFLMDL | 179 |
| ALPHA             | NNATNVVIKVCFFQFCNDPFLGVY-YHKNNKSWMESEFRVYSSANNCTFEYVSQPFLMDL | 176 |
| ETA               | NNATNVVIKVCFFQFCNDPFLGVY-YHKNNKSWMESEFRVYSSANNCTFEYVSQPFLMDL | 176 |
| Omicron BA.1      | NNATNVVIKVCFFQFCNDPFLDVY-YHKNNKSWMESEFRVYSSANNCTFEYVSQPFLMDL | 174 |
| Omicron BA.2      | NNATNVVIKVCFFQFCNDPFLDVY-YHKNNKSWMESEFRVYSSANNCTFEYVSQPFLMDL | 176 |
| Omicron BA.2.12.1 | NNATNVVIKVCFFQFCNDPFLDVY-YHKNNKSWMESEFRVYSSANNCTFEYVSQPFLMDL | 176 |
| Omicron BA.4      | NNATNVVIKVCFFQFCNDPFLDVY-YHKNNKSWMESEFRVYSSANNCTFEYVSQPFLMDL | 174 |
| Omicron BA.5      | NNATNVVIKVCFFQFCNDPFLDVY-YHKNNKSWMESEFRVYSSANNCTFEYVSQPFLMDL | 174 |
|                   | *****.*** *** ***** *                                        |     |

|                   |                                                               |     |
|-------------------|---------------------------------------------------------------|-----|
| wild type         | EGKQGNFKNLREFVFKNIDGYFKIYSKHTPINL--VRDLPQGFSALEPLVDLPIGINITR  | 237 |
| DELTA             | EGKQGNFKNLREFVFKNIDGYFKIYSKHTPINL--VRDLPQGFSALEPLVDLPIGINITR  | 235 |
| LAMBDA            | EGKQGNFKNLREFVFKNIDGYFKIYSKHTPINL--VRDLPQGFSALEPLVDLPIGINITR  | 237 |
| MU                | EGKQGNFKNLREFVFKNIDGYFKIYSKHTPINL--VRDLPQGFSALEPLVDLPIGINITR  | 238 |
| BETA              | EGKQGNFKNLREFVFKNIDGYFKIYSKHTPINL--VRDLPQGFSALEPLVDLPIGINITR  | 237 |
| GAMMA             | EGKQGNFKNLSEFVFKNIDGYFKIYSKHTPINL--VRDLPQGFSALEPLVDLPIGINITR  | 237 |
| B.1.1.318         | EGKQGNFKNLREFVFKNIDGYFKIYSKHTPINL--VRDLPQGFSALEPLVDLPIGINITR  | 236 |
| KAPPA             | EGKQGNFKNLREFVFKNIDGYFKIYSKHTPINL--VRDLPQGFSALEPLVDLPIGINITR  | 237 |
| A 23.1            | EGKQGNFKNLREFVFKNIDGYFKIYSKHTPINL--VRDLPQGFSALEPLVDLPIGINITR  | 237 |
| IOTA              | EGKQGNFKNLREFVFKNIDGYFKIYSKHTPINL--VRDLPQGFSALEPLVDLPIGINITR  | 237 |
| THETA             | EGKQGNFKNLREFVFKNIDGYFKIYSKHTPINL--VRDLPQGFSALEPLVDLPIGINITR  | 237 |
| EPSILON           | EGKQGNFKNLREFVFKNIDGYFKIYSKHTPINL--VRDLPQGFSALEPLVDLPIGINITR  | 237 |
| 20 A.EU1          | EGKQGNFKNLREFVFKNIDGYFKIYSKHTPINL--VRDLPQGFSLEPLVDLPIGINITR   | 237 |
| 20 A.EU2          | EGKQGNFKNLREFVFKNIDGYFKIYSKHTPINL--VRDLPQGFSALEPLVDLPIGINITR  | 237 |
| ZETA              | EGKQGNFKNLREFVFKNIDGYFKIYSKHTPINL--VRDLPQGFSALEPLVDLPIGINITR  | 237 |
| ALPHA             | EGKQGNFKNLREFVFKNIDGYFKIYSKHTPINL--VRDLPQGFSALEPLVDLPIGINITR  | 234 |
| ETA               | EGKQGNFKNLREFVFKNIDGYFKIYSKHTPINL--VRDLPQGFSALEPLVDLPIGINITR  | 234 |
| Omicron BA.1      | EGKQGNFKNLREFVFKNIDGYFKIYSKHTPINLIVREEDLPQGFSALEPLVDLPIGINITR | 234 |
| Omicron BA.2      | EGKQGNFKNLREFVFKNIDGYFKIYSKHTPINL--GRDLPQGFSALEPLVDLPIGINITR  | 234 |
| Omicron BA.2.12.1 | EGKQGNFKNLREFVFKNIDGYFKIYSKHTPINL--GRDLPQGFSALEPLVDLPIGINITR  | 234 |
| Omicron BA.4      | EGKQGNFKNLREFVFKNIDGYFKIYSKHTPINL--GRDLPQGFSALEPLVDLPIGINITR  | 232 |
| Omicron BA.5      | EGKQGNFKNLREFVFKNIDGYFKIYSKHTPINL--GRDLPQGFSALEPLVDLPIGINITR  | 232 |
|                   | ***** : ..*****                                               |     |

|                   |                                                            |     |
|-------------------|------------------------------------------------------------|-----|
| wild type         | FQTLALHRSYLTGPDSSSGWTAGAAAYVGYLQPRTFLLKYNENGTITDAVDCALDPLS | 297 |
| DELTA             | FQTLALHRSYLTGPDSSSGWTAGAAAYVGYLQPRTFLLKYNENGTITDAVDCALDPLS | 295 |
| LAMBDA            | FQTLALHNS-----SSSGWTAGAAAYVGYLQPRTFLLKYNENGTITDAVDCALDPLS  | 290 |
| MU                | FQTLALHRSYLTGPDSSSGWTAGAAAYVGYLQPRTFLLKYNENGTITDAVDCALDPLS | 298 |
| BETA              | FQTLALHRSYLTGPDSSSGWTAGAAAYVGYLQPRTFLLKYNENGTITDAVDCALDPLS | 294 |
| GAMMA             | FQTLALHRSYLTGPDSSSGWTAGAAAYVGYLQPRTFLLKYNENGTITDAVDCALDPLS | 297 |
| B.1.1.318         | FQTLALHRSYLTGPDSSSGWTAGAAAYVGYLQPRTFLLKYNENGTITDAVDCALDPLS | 296 |
| KAPPA             | FQTLALHRSYLTGPDSSSGWTAGAAAYVGYLQPRTFLLKYNENGTITDAVDCALDPLS | 297 |
| A 23.1            | FQTLALHRSYLTGPDSSSGWTAGAAAYVGYLQPRTFLLKYNENGTITDAVDCALDPLS | 297 |
| IOTA              | FQTLALHRSYLTGPDSSSGWTAGAAAYVGYLQPRTFLLKYNENGTITDAVDCALDPLS | 297 |
| THETA             | FQTLALHRSYLTGPDSSSGWTAGAAAYVGYLQPRTFLLKYNENGTITDAVDCALDPLS | 297 |
| EPSILON           | FQTLALHRSYLTGPDSSSGWTAGAAAYVGYLQPRTFLLKYNENGTITDAVDCALDPLS | 297 |
| 20 A.EU1          | FQTLALHRSYLTGPDSSSGWTAGAAAYVGYLQPRTFLLKYNENGTITDAVDCALDPLS | 297 |
| 20 A.EU2          | FQTLALHRSYLTGPDSSSGWTAGAAAYVGYLQPRTFLLKYNENGTITDAVDCALDPLS | 297 |
| ZETA              | FQTLALHRSYLTGPDSSSGWTAGAAAYVGYLQPRTFLLKYNENGTITDAVDCALDPLS | 297 |
| ALPHA             | FQTLALHRSYLTGPDSSSGWTAGAAAYVGYLQPRTFLLKYNENGTITDAVDCALDPLS | 294 |
| ETA               | FQTLALHRSYLTGPDSSSGWTAGAAAYVGYLQPRTFLLKYNENGTITDAVDCALDPLS | 294 |
| Omicron BA.1      | FQTLALHRSYLTGPDSSSGWTAGAAAYVGYLQPRTFLLKYNENGTITDAVDCALDPLS | 294 |
| Omicron BA.2      | FQTLALHRSYLTGPDSSSGWTAGAAAYVGYLQPRTFLLKYNENGTITDAVDCALDPLS | 294 |
| Omicron BA.2.12.1 | FQTLALHRSYLTGPDSSSGWTAGAAAYVGYLQPRTFLLKYNENGTITDAVDCALDPLS | 294 |
| Omicron BA.4      | FQTLALHRSYLTGPDSSSGWTAGAAAYVGYLQPRTFLLKYNENGTITDAVDCALDPLS | 292 |
| Omicron BA.5      | FQTLALHRSYLTGPDSSSGWTAGAAAYVGYLQPRTFLLKYNENGTITDAVDCALDPLS | 292 |
|                   | *** ** *****                                               |     |

|                   |                                                              |     |
|-------------------|--------------------------------------------------------------|-----|
| wild type         | ETKCTLKSFTVEKGIYQTSNFRVQPTESIVRFPNITNLCPFGEVFNATRFASVYAWNRRK | 357 |
| DELTA             | ETKCTLKSFTVEKGIYQTSNFRVQPTESIVRFPNITNLCPFGEVFNATRFASVYAWNRRK | 355 |
| LAMBDA            | ETKCTLKSFTVEKGIYQTSNFRVQPTESIVRFPNITNLCPFGEVFNATRFASVYAWNRRK | 350 |
| MU                | ETKCTLKSFTVEKGIYQTSNFRVQPTESIVRFPNITNLCPFGEVFNATRFASVYAWNRRK | 358 |
| BETA              | ETKCTLKSFTVEKGIYQTSNFRVQPTESIVRFPNITNLCPFGEVFNATRFASVYAWNRRK | 354 |
| GAMMA             | ETKCTLKSFTVEKGIYQTSNFRVQPTESIVRFPNITNLCPFGEVFNATRFASVYAWNRRK | 357 |
| B.1.1.318         | ETKCTLKSFTVEKGIYQTSNFRVQPTESIVRFPNITNLCPFGEVFNATRFASVYAWNRRK | 356 |
| KAPPA             | ETKCTLKSFTVEKGIYQTSNFRVQPTESIVRFPNITNLCPFGEVFNATRFASVYAWNRRK | 357 |
| A 23.1            | ETKCTLKSFTVEKGIYQTSNFRVQPTESIVRFPNITNLCPFGEVFNATRFASVYAWNRRK | 357 |
| IOTA              | ETKCTLKSFTVEKGIYQTSNFRVQPTESIVRFPNITNLCPFGEVFNATRFASVYAWNRRK | 357 |
| THETA             | ETKCTLKSFTVEKGIYQTSNFRVQPTESIVRFPNITNLCPFGEVFNATRFASVYAWNRRK | 357 |
| EPSILON           | ETKCTLKSFTVEKGIYQTSNFRVQPTESIVRFPNITNLCPFGEVFNATRFASVYAWNRRK | 357 |
| 20 A.EU1          | ETKCTLKSFTVEKGIYQTSNFRVQPTESIVRFPNITNLCPFGEVFNATRFASVYAWNRRK | 357 |
| 20 A.EU2          | ETKCTLKSFTVEKGIYQTSNFRVQPTESIVRFPNITNLCPFGEVFNATRFASVYAWNRRK | 357 |
| ZETA              | ETKCTLKSFTVEKGIYQTSNFRVQPTESIVRFPNITNLCPFGEVFNATRFASVYAWNRRK | 357 |
| ALPHA             | ETKCTLKSFTVEKGIYQTSNFRVQPTESIVRFPNITNLCPFGEVFNATRFASVYAWNRRK | 354 |
| ETA               | ETKCTLKSFTVEKGIYQTSNFRVQPTESIVRFPNITNLCPFGEVFNATRFASVYAWNRRK | 354 |
| Omicron BA.1      | ETKCTLKSFTVEKGIYQTSNFRVQPTESIVRFPNITNLCPFGEVFNATRFASVYAWNRRK | 354 |
| Omicron BA.2      | ETKCTLKSFTVEKGIYQTSNFRVQPTESIVRFPNITNLCPFGEVFNATRFASVYAWNRRK | 354 |
| Omicron BA.2.12.1 | ETKCTLKSFTVEKGIYQTSNFRVQPTESIVRFPNITNLCPFGEVFNATRFASVYAWNRRK | 354 |
| Omicron BA.4      | ETKCTLKSFTVEKGIYQTSNFRVQPTESIVRFPNITNLCPFGEVFNATRFASVYAWNRRK | 352 |
| Omicron BA.5      | ETKCTLKSFTVEKGIYQTSNFRVQPTESIVRFPNITNLCPFGEVFNATRFASVYAWNRRK | 352 |
|                   | ***** : *****                                                |     |

|                   |                                                                 |     |
|-------------------|-----------------------------------------------------------------|-----|
| wild type         | ISNCVADYSVLYNSASFSTFKCYGVSP TKLNDLCFTNVYADSFVIRGDEV RQIAPGQTGK  | 417 |
| DELTA             | ISNCVADYSVLYNSASFSTFKCYGVSP TKLNDLCFTNVYADSFVIRGDEV RQIAPGQTGK  | 415 |
| LAMBDA            | ISNCVADYSVLYNSASFSTFKCYGVSP TKLNDLCFTNVYADSFVIRGDEV RQIAPGQTGK  | 410 |
| MU                | ISNCVADYSVLYNSASFSTFKCYGVSP TKLNDLCFTNVYADSFVIRGDEV RQIAPGQTGK  | 418 |
| BETA              | ISNCVADYSVLYNSASFSTFKCYGVSP TKLNDLCFTNVYADSFVIRGDEV RQIAPGQTGK  | 414 |
| GAMMA             | ISNCVADYSVLYNSASFSTFKCYGVSP TKLNDLCFTNVYADSFVIRGDEV RQIAPGQTGT  | 417 |
| B.1.1.318         | ISNCVADYSVLYNSASFSTFKCYGVSP TKLNDLCFTNVYADSFVIRGDEV RQIAPGQTGK  | 416 |
| KAPPA             | ISNCVADYSVLYNSASFSTFKCYGVSP TKLNDLCFTNVYADSFVIRGDEV RQIAPGQTGK  | 417 |
| A 23.1            | ISNCVADYSVLYNSASFSTFKCYGVSP TKLNDLCFTNVYADSFVIRGDEV RQIAPGQTGK  | 417 |
| IOTA              | ISNCVADYSVLYNSASFSTFKCYGVSP TKLNDLCFTNVYADSFVIRGDEV RQIAPGQTGK  | 417 |
| THETA             | ISNCVADYSVLYNSASFSTFKCYGVSP TKLNDLCFTNVYADSFVIRGDEV RQIAPGQTGK  | 417 |
| EPSILON           | ISNCVADYSVLYNSASFSTFKCYGVSP TKLNDLCFTNVYADSFVIRGDEV RQIAPGQTGK  | 417 |
| 20 A.EU1          | ISNCVADYSVLYNSASFSTFKCYGVSP TKLNDLCFTNVYADSFVIRGDEV RQIAPGQTGK  | 417 |
| 20 A.EU2          | ISNCVADYSVLYNSASFSTFKCYGVSP TKLNDLCFTNVYADSFVIRGDEV RQIAPGQTGK  | 417 |
| ZETA              | ISNCVADYSVLYNSASFSTFKCYGVSP TKLNDLCFTNVYADSFVIRGDEV RQIAPGQTGK  | 417 |
| ALPHA             | ISNCVADYSVLYNSASFSTFKCYGVSP TKLNDLCFTNVYADSFVIRGDEV RQIAPGQTGK  | 414 |
| ETA               | ISNCVADYSVLYNSASFSTFKCYGVSP TKLNDLCFTNVYADSFVIRGDEV RQIAPGQTGK  | 414 |
| Omicron BA.1      | ISNCVADYSVLYNLAF FFFTKCYGVSP TKLNDLCFTNVYADSFVIRGDEV RQIAPGQTGN | 414 |
| Omicron BA.2      | ISNCVADYSVLYNFA FFFAFKCYGVSP TKLNDLCFTNVYADSFVIRGDEV RQIAPGQTGN | 414 |
| Omicron BA.2.12.1 | ISNCVADYSVLYNFA FFFAFKCYGVSP TKLNDLCFTNVYADSFVIRGDEV RQIAPGQTGN | 414 |
| Omicron BA.4      | ISNCVADYSVLYNFA FFFAFKCYGVSP TKLNDLCFTNVYADSFVIRGDEV RQIAPGQTGN | 412 |
| Omicron BA.5      | ISNCVADYSVLYNFA FFFAFKCYGVSP TKLNDLCFTNVYADSFVIRGDEV RQIAPGQTGN | 412 |
|                   | *****.*** * :*****.*** *****.                                   |     |

|                   |                                                               |     |
|-------------------|---------------------------------------------------------------|-----|
| wild type         | IADYNYKLPDDFTGCVIAWNSNNLDSKVGGNYNYLYRLFRKSNLKPFERDISTEIIYQAGS | 477 |
| DELTA             | IADYNYKLPDDFTGCVIAWNSNNLDSKVGGNYNYRYRLFRKSNLKPFERDISTEIIYQAGS | 475 |
| LAMBDA            | IADYNYKLPDDFTGCVIAWNSNNLDSKVGGNYNYQYRLFRKSNLKPFERDISTEIIYQAGS | 470 |
| MU                | IADYNYKLPDDFTGCVIAWNSNNLDSKVGGNYNYLYRLFRKSNLKPFERDISTEIIYQAGS | 478 |
| BETA              | IADYNYKLPDDFTGCVIAWNSNNLDSKVGGNYNYLYRLFRKSNLKPFERDISTEIIYQAGS | 474 |
| GAMMA             | IADYNYKLPDDFTGCVIAWNSNNLDSKVGGNYNYLYRLFRKSNLKPFERDISTEIIYQAGS | 477 |
| B.1.1.318         | IADYNYKLPDDFTGCVIAWNSNNLDSKVGGNYNYLYRLFRKSNLKPFERDISTEIIYQAGS | 476 |
| KAPPA             | IADYNYKLPDDFTGCVIAWNSNNLDSKVGGNYNYRYRLFRKSNLKPFERDISTEIIYQAGS | 477 |
| A 23.1            | IADYNYKLPDDFTGCVIAWNSNNLDSKVGGNYNYLYRLFRKSNLKPFERDISTEIIYQAGS | 477 |
| IOTA              | IADYNYKLPDDFTGCVIAWNSNNLDSKVGGNYNYLYRLFRKSNLKPFERDISTEIIYQAGS | 477 |
| THETA             | IADYNYKLPDDFTGCVIAWNSNNLDSKVGGNYNYLYRLFRKSNLKPFERDISTEIIYQAGS | 477 |
| EPSILON           | IADYNYKLPDDFTGCVIAWNSNNLDSKVGGNYNYRYRLFRKSNLKPFERDISTEIIYQAGS | 477 |
| 20 A.EU1          | IADYNYKLPDDFTGCVIAWNSNNLDSKVGGNYNYLYRLFRKSNLKPFERDISTEIIYQAGS | 477 |
| 20 A.EU2          | IADYNYKLPDDFTGCVIAWNSNNLDSKVGGNYNYLYRLFRKSNLKPFERDISTEIIYQAGN | 477 |
| ZETA              | IADYNYKLPDDFTGCVIAWNSNNLDSKVGGNYNYLYRLFRKSNLKPFERDISTEIIYQAGS | 477 |
| ALPHA             | IADYNYKLPDDFTGCVIAWNSNNLDSKVGGNYNYLYRLFRKSNLKPFERDISTEIIYQAGS | 474 |
| ETA               | IADYNYKLPDDFTGCVIAWNSNNLDSKVGGNYNYLYRLFRKSNLKPFERDISTEIIYQAGS | 474 |
| Omicron BA.1      | IADYNYKLPDDFTGCVIAWNSNNLDSKVGGNYNYLYRLFRKSNLKPFERDISTEIIYQAGN | 474 |
| Omicron BA.2      | IADYNYKLPDDFTGCVIAWNSNNLDSKVGGNYNYLYRLFRKSNLKPFERDISTEIIYQAGN | 474 |
| Omicron BA.2.12.1 | IADYNYKLPDDFTGCVIAWNSNNLDSKVGGNYNYQYRLFRKSNLKPFERDISTEIIYQAGN | 474 |
| Omicron BA.4      | IADYNYKLPDDFTGCVIAWNSNNLDSKVGGNYNYRYRLFRKSNLKPFERDISTEIIYQAGN | 472 |
| Omicron BA.5      | IADYNYKLPDDFTGCVIAWNSNNLDSKVGGNYNYRYRLFRKSNLKPFERDISTEIIYQAGN | 472 |
|                   | *****.*****.***** *****.                                      |     |

|                   |                                                               |     |
|-------------------|---------------------------------------------------------------|-----|
| wild type         | TPCNGV EGFNCYFPLQSYGFQPTNGVG YQPYRVVLSFELLHAPATVCGPKKSTNLVKNK | 537 |
| DELTA             | KPCNGVEGFNCYFPLQSYGFQPTNGVG YQPYRVVLSFELLHAPATVCGPKKSTNLVKNK  | 535 |
| LAMBDA            | TPCNGVEGFNCY FPLQSYGFQPTNGVG YQPYRVVLSFELLHAPATVCGPKKSTNLVKNK | 530 |
| MU                | TPCNGVKGFNCYFPLQSYGFQPTYGVGY QPYRVVLSFELLHAPATVCGPKKSTNLVKNK  | 538 |
| BETA              | TPCNGVKGFNCYFPLQSYGFQPTYGVGY QPYRVVLSFELLHAPATVCGPKKSTNLVKNK  | 534 |
| GAMMA             | TPCNGVKGFNCYFPLQSYGFQPTYGVGY QPYRVVLSFELLHAPATVCGPKKSTNLVKNK  | 537 |
| B.1.1.318         | TPCNGVEGFNCYFPLQSYGFQPTNGVG YQPYRVVLSFELLHAPATVCGPKKSTNLVKNK  | 536 |
| KAPPA             | TPCNGVQGFNCYFPLQSYGFQPTNGVG YQPYRVVLSFELLHAPATVCGPKKSTNLVKNK  | 537 |
| A 23.1            | TPCNGVEGFNCYFPLQSYGFQPTNGVG YQPYRVVLSFELLHAPATVCGPKKSTNLVKNK  | 537 |
| IOTA              | TPCNGVKGFNCYFPLQSYGFQPTNGVG YQPYRVVLSFELLHAPATVCGPKKSTNLVKNK  | 537 |
| THETA             | TPCNGVKGFNCYFPLQSYGFQPTYGVGY QPYRVVLSFELLHAPATVCGPKKSTNLVKNK  | 537 |
| EPSILON           | TPCNGVEGFNCYFPLQSYGFQPTNGVG YQPYRVVLSFELLHAPATVCGPKKSTNLVKNK  | 537 |
| 20 A.EU1          | TPCNGVEGFNCYFPLQSYGFQPTNGVG YQPYRVVLSFELLHAPATVCGPKKSTNLVKNK  | 537 |
| 20 A.EU2          | TPCNGVEGFNCYFPLQSYGFQPTNGVG YQPYRVVLSFELLHAPATVCGPKKSTNLVKNK  | 537 |
| ZETA              | TPCNGVKGFNCYFPLQSYGFQPTNGVG YQPYRVVLSFELLHAPATVCGPKKSTNLVKNK  | 537 |
| ALPHA             | TPCNGVEGFNCYFPLQSYGFQPTYGVGY QPYRVVLSFELLHAPATVCGPKKSTNLVKNK  | 534 |
| ETA               | TPCNGVKGFNCYFPLQSYGFQPTNGVG YQPYRVVLSFELLHAPATVCGPKKSTNLVKNK  | 534 |
| Omicron BA.1      | KPCNGVAGFNCYFPLRSYGRPTYGVGH QPYRVVLSFELLHAPATVCGPKKSTNLVKNK   | 534 |
| Omicron BA.2      | KPCNGVAGFNCYFPLRSYGRPTYGVGH QPYRVVLSFELLHAPATVCGPKKSTNLVKNK   | 534 |
| Omicron BA.2.12.1 | KPCNGVAGFNCYFPLRSYGRPTYGVGH QPYRVVLSFELLHAPATVCGPKKSTNLVKNK   | 534 |
| Omicron BA.4      | KPCNGVAGVNCYFPLQSYGRPTYGVGH QPYRVVLSFELLHAPATVCGPKKSTNLVKNK   | 532 |
| Omicron BA.5      | KPCNGVAGVNCYFPLQSYGRPTYGVGH QPYRVVLSFELLHAPATVCGPKKSTNLVKNK   | 532 |
|                   | .***** *.*** **:*.*:** **:*****.                              |     |

wild type CVNFFNFNGLTGTGVLTESNKKFLPFQQFGRDIADTTDAVRDPQTLEILDITPCSFGGVSV 597  
DELTA CVNFFNFNGLTGTGVLTESNKKFLPFQQFGRDIADTTDAVRDPQTLEILDITPCSFGGVSV 595  
LAMBDA CVNFFNFNGLTGTGVLTESNKKFLPFQQFGRDIADTTDAVRDPQTLEILDITPCSFGGVSV 590  
MU CVNFFNFNGLTGTGVLTESNKKFLPFQQFGRDIADTTDAVRDPQTLEILDITPCSFGGVSV 598  
BETA CVNFFNFNGLTGTGVLTESNKKFLPFQQFGRDIADTTDAVRDPQTLEILDITPCSFGGVSV 594  
GAMMA CVNFFNFNGLTGTGVLTESNKKFLPFQQFGRDIADTTDAVRDPQTLEILDITPCSFGGVSV 597  
B.1.1.318 CVNFFNFNGLTGTGVLTESNKKFLPFQQFGRDIADTTDAVRDPQTLEILDITPCSFGGVSV 596  
KAPPA CVNFFNFNGLTGTGVLTESNKKFLPFQQFGRDIADTTDAVRDPQTLEILDITPCSFGGVSV 597  
A 23.1 CVNFFNFNGLTGTGVLTESNKKFLPFQQFGRDIADTTDAVRDPQTLEILDITPCSFGGVSV 597  
IOTA CVNFFNFNGLTGTGVLTESNKKFLPFQQFGRDIADTTDAVRDPQTLEILDITPCSFGGVSV 597  
THETA CVNFFNFNGLTGTGVLTESNKKFLPFQQFGRDIADTTDAVRDPQTLEILDITPCSFGGVSV 597  
EPSILON CVNFFNFNGLTGTGVLTESNKKFLPFQQFGRDIADTTDAVRDPQTLEILDITPCSFGGVSV 597  
20 A.EU1 CVNFFNFNGLTGTGVLTESNKKFLPFQQFGRDIADTTDAVRDPQTLEILDITPCSFGGVSV 597  
20 A.EU2 CVNFFNFNGLTGTGVLTESNKKFLPFQQFGRDIADTTDAVRDPQTLEILDITPCSFGGVSV 597  
ZETA CVNFFNFNGLTGTGVLTESNKKFLPFQQFGRDIADTTDAVRDPQTLEILDITPCSFGGVSV 597  
ALPHA CVNFFNFNGLTGTGVLTESNKKFLPFQQFGRDIADTTDAVRDPQTLEILDITPCSFGGVSV 594  
ETA CVNFFNFNGLTGTGVLTESNKKFLPFQQFGRDIADTTDAVRDPQTLEILDITPCSFGGVSV 594  
Omicron BA.1 CVNFFNFNGLTGTGVLTESNKKFLPFQQFGRDIADTTDAVRDPQTLEILDITPCSFGGVSV 594  
Omicron BA.2 CVNFFNFNGLTGTGVLTESNKKFLPFQQFGRDIADTTDAVRDPQTLEILDITPCSFGGVSV 594  
Omicron BA.2.12.1 CVNFFNFNGLTGTGVLTESNKKFLPFQQFGRDIADTTDAVRDPQTLEILDITPCSFGGVSV 594  
Omicron BA.4 CVNFFNFNGLTGTGVLTESNKKFLPFQQFGRDIADTTDAVRDPQTLEILDITPCSFGGVSV 592  
Omicron BA.5 CVNFFNFNGLTGTGVLTESNKKFLPFQQFGRDIADTTDAVRDPQTLEILDITPCSFGGVSV 592  
\*\*\*\*\*.\*\*\*\*\*

wild type ITPGTNTSNQVAVLYQVNVCTEVPVAIHADQLTPTWRVYSTGNSNVFQTRAGCLIGAEHVN 657  
DELTA ITPGTNTSNQVAVLYQGVNCTEVPVAIHADQLTPTWRVYSTGNSNVFQTRAGCLIGAEHVN 655  
LAMBDA ITPGTNTSNQVAVLYQGVNCTEVPVAIHADQLTPTWRVYSTGNSNVFQTRAGCLIGAEHVN 650  
MU ITPGTNTSNQVAVLYQGVNCTEVPVAIHADQLTPTWRVYSTGNSNVFQTRAGCLIGAEHVN 658  
BETA ITPGTNTSNQVAVLYQGVNCTEVPVAIHADQLTPTWRVYSTGNSNVFQTRAGCLIGAEHVN 654  
GAMMA ITPGTNTSNQVAVLYQGVNCTEVPVAIHADQLTPTWRVYSTGNSNVFQTRAGCLIGAEHVN 657  
B.1.1.318 ITPGTNTSNQVAVLYQHVNCTEVPVAIHADQLTPTWRVYSTGNSNVFQTRAGCLIGAEHVN 656  
KAPPA ITPGTNTSNQVAVLYQGVNCTEVPVAIHADQLTPTWRVYSTGNSNVFQTRAGCLIGAEHVN 657  
A 23.1 ITPGTNTSNQVAVLYHVDNCTEVPVAIHADQLTPTWRVYSTGNSNVFQTRAGCLIGAEHVN 657  
IOTA ITPGTNTSNQVAVLYQGVNCTEVPVAIHADQLTPTWRVYSTGNSNVFQTRAGCLIGAEHVN 657  
THETA ITPGTNTSNQVAVLYQGVNCTEVPVAIHADQLTPTWRVYSTGNSNVFQTRAGCLIGAEHVN 657  
EPSILON ITPGTNTSNQVAVLYQGVNCTEVPVAIHADQLTPTWRVYSTGNSNVFQTRAGCLIGAEHVN 657  
20 A.EU1 ITPGTNTSNQVAVLYQGVNCTEVPVAIHADQLTPTWRVYSTGNSNVFQTRAGCLIGAEHVN 657  
20 A.EU2 ITPGTNTSNQVAVLYQGVNCTEVPVAIHADQLTPTWRVYSTGNSNVFQTRAGCLIGAEHVN 657  
ZETA ITPGTNTSNQVAVLYQGVNCTEVPVAIHADQLTPTWRVYSTGNSNVFQTRAGCLIGAEHVN 657  
ALPHA ITPGTNTSNQVAVLYQGVNCTEVPVAIHADQLTPTWRVYSTGNSNVFQTRAGCLIGAEHVN 654  
ETA ITPGTNTSNQVAVLYQGVNCTEVPVAIHADQLTPTWRVYSTGNSNVFQTRAGCLIGAEHVN 654  
Omicron BA.1 ITPGTNTSNQVAVLYQGVNCTEVPVAIHADQLTPTWRVYSTGNSNVFQTRAGCLIGAEHVN 654  
Omicron BA.2 ITPGTNTSNQVAVLYQGVNCTEVPVAIHADQLTPTWRVYSTGNSNVFQTRAGCLIGAEHVN 654  
Omicron BA.2.12.1 ITPGTNTSNQVAVLYQGVNCTEVPVAIHADQLTPTWRVYSTGNSNVFQTRAGCLIGAEHVN 654  
Omicron BA.4 ITPGTNTSNQVAVLYQGVNCTEVPVAIHADQLTPTWRVYSTGNSNVFQTRAGCLIGAEHVN 652  
Omicron BA.5 ITPGTNTSNQVAVLYQGVNCTEVPVAIHADQLTPTWRVYSTGNSNVFQTRAGCLIGAEHVN 652  
\*\*\*\*\*.\*\*\*\*\*

wild type NSYECDIPIGAGICASYQTQTNSPRRARSVASQSI IAYTMSLGAENSVAYSNNNSIAIPTN 717  
DELTA NSYECDIPIGAGICASYQTQTNSPRRARSVASQSI IAYTMSLGAENSVAYSNNNSIAIPTN 715  
LAMBDA NSYECDIPIGAGICASYQTQTNSPRRARSVASQSI IAYTMSLGAENSVAYSNNNSIAIPTN 710  
MU NSYECDIPIGAGICASYQTQTNSHRRARSVASQSI IAYTMSLGAENSVAYSNNNSIAIPTN 718  
BETA NSYECDIPIGAGICASYQTQTNSPRRARSVASQSI IAYTMSLGVENSVAYSNNNSIAIPTN 714  
GAMMA NSYECDIPIGAGICASYQTQTNSPRRARSVASQSI IAYTMSLGAENSVAYSNNNSIAIPTN 717  
B.1.1.318 NSYECDIPIGAGICASYQTQTNSPRRARSVASQSI IAYTMSLGAENSVAYSNNNSIAIPTN 716  
KAPPA NSYECDIPIGAGICASYQTQTNSPRRARSVASQSI IAYTMSLGAENSVAYSNNNSIAIPTN 717  
A 23.1 NSYECDIPIGAGICASYQTQTNSPRRARSVASQSI IAYTMSLGAENSVAYSNNNSIAIPTN 717  
IOTA NSYECDIPIGAGICASYQTQTNSPRRARSVASQSI IAYTMSLGVENSVAYSNNNSIAIPTN 717  
THETA NSYECDIPIGAGICASYQTQTNSHRRARSVASQSI IAYTMSLGAENSVAYSNNNSIAIPTN 717  
EPSILON NSYECDIPIGAGICASYQTQTNSPRRARSVASQSI IAYTMSLGAENSVAYSNNNSIAIPTN 717  
20 A.EU1 NSYECDIPIGAGICASYQTQTNSPRRARSVASQSI IAYTMSLGAENSVAYSNNNSIAIPTN 717  
20 A.EU2 NSYECDIPIGAGICASYQTQTNSPRRARSVASQSI IAYTMSLGAENSVAYSNNNSIAIPTN 717  
ZETA NSYECDIPIGAGICASYQTQTNSPRRARSVASQSI IAYTMSLGAENSVAYSNNNSIAIPTN 717  
ALPHA NSYECDIPIGAGICASYQTQTNSHRRARSVASQSI IAYTMSLGAENSVAYSNNNSIAIPTN 714  
ETA NSYECDIPIGAGICASYQTQTNSPRRARSVASQSI IAYTMSLGAENSVAYSNNNSIAIPTN 714  
Omicron BA.1 NSYECDIPIGAGICASYQTQTNKSHRRARSVASQSI IAYTMSLGAENSVAYSNNNSIAIPTN 714  
Omicron BA.2 NSYECDIPIGAGICASYQTQTNKSHRRARSVASQSI IAYTMSLGAENSVAYSNNNSIAIPTN 714  
Omicron BA.2.12.1 NSYECDIPIGAGICASYQTQTNKSHRRARSVASQSI IAYTMSLGAENSVAYSNNNSIAIPTN 714  
Omicron BA.4 NSYECDIPIGAGICASYQTQTNKSHRRARSVASQSI IAYTMSLGAENSVAYSNNNSIAIPTN 712  
Omicron BA.5 NSYECDIPIGAGICASYQTQTNKSHRRARSVASQSI IAYTMSLGAENSVAYSNNNSIAIPTN 712  
\*\*\*\*\*.\*\*\*\*\*



|                   |                                                               |     |
|-------------------|---------------------------------------------------------------|-----|
| wild type         | FTISVTTEILPVSMTKTSVDCTMYICGDSTEC SNLLQLYGSFCTQLNRALTGIAVEQDKN | 777 |
| DELTA             | FTISVTTEILPVSMTKTSVDCTMYICGDSTEC SNLLQLYGSFCTQLNRALTGIAVEQDKN | 775 |
| LAMBDA            | FTISVTTEILPVSMTKTSVDCTMYICGDSTEC SNLLQLYGSFCTQLNRALTGIAVEQDKN | 770 |
| MU                | FTISVTTEILPVSMTKTSVDCTMYICGDSTEC SNLLQLYGSFCTQLNRALTGIAVEQDKN | 778 |
| BETA              | FTISVTTEILPVSMTKTSVDCTMYICGDSTEC SNLLQLYGSFCTQLNRALTGIAVEQDKN | 774 |
| GAMMA             | FTISVTTEILPVSMTKTSVDCTMYICGDSTEC SNLLQLYGSFCTQLNRALTGIAVEQDKN | 777 |
| B.1.1.318         | FTISVTTEILPVSMTKTSVDCTMYICGDSTEC SNLLQLYGSFCTQLNRALTGIAVEQDKN | 776 |
| KAPPA             | FTISVTTEILPVSMTKTSVDCTMYICGDSTEC SNLLQLYGSFCTQLNRALTGIAVEQDKN | 777 |
| A 23.1            | FTISVTTEILPVSMTKTSVDCTMYICGDSTEC SNLLQLYGSFCTQLNRALTGIAVEQDKN | 777 |
| IOTA              | FTISVTTEILPVSMTKTSVDCTMYICGDSTEC SNLLQLYGSFCTQLNRALTGIAVEQDKN | 777 |
| THETA             | FTISVTTEILPVSMTKTSVDCTMYICGDSTEC SNLLQLYGSFCTQLNRALTGIAVEQDKN | 777 |
| EPSILON           | FTISVTTEILPVSMTKTSVDCTMYICGDSTEC SNLLQLYGSFCTQLNRALTGIAVEQDKN | 777 |
| 20 A.EU1          | FTISVTTEILPVSMTKTSVDCTMYICGDSTEC SNLLQLYGSFCTQLNRALTGIAVEQDKN | 777 |
| 20 A.EU2          | FTISVTTEILPVSMTKTSVDCTMYICGDSTEC SNLLQLYGSFCTQLNRALTGIAVEQDKN | 777 |
| ZETA              | FTISVTTEILPVSMTKTSVDCTMYICGDSTEC SNLLQLYGSFCTQLNRALTGIAVEQDKN | 777 |
| ALPHA             | FTISVTTEILPVSMTKTSVDCTMYICGDSTEC SNLLQLYGSFCTQLNRALTGIAVEQDKN | 774 |
| ETA               | FTISVTTEILPVSMTKTSVDCTMYICGDSTEC SNLLQLYGSFCTQLNRALTGIAVEQDKN | 774 |
| Omicron BA.1      | FTISVTTEILPVSMTKTSVDCTMYICGDSTEC SNLLQLYGSFCTQLNRALTGIAVEQDKN | 774 |
| Omicron BA.2      | FTISVTTEILPVSMTKTSVDCTMYICGDSTEC SNLLQLYGSFCTQLNRALTGIAVEQDKN | 774 |
| Omicron BA.2.12.1 | FTISVTTEILPVSMTKTSVDCTMYICGDSTEC SNLLQLYGSFCTQLNRALTGIAVEQDKN | 774 |
| Omicron BA.4      | FTISVTTEILPVSMTKTSVDCTMYICGDSTEC SNLLQLYGSFCTQLNRALTGIAVEQDKN | 772 |
| Omicron BA.5      | FTISVTTEILPVSMTKTSVDCTMYICGDSTEC SNLLQLYGSFCTQLNRALTGIAVEQDKN | 772 |
|                   | *****:*****                                                   |     |

|                  |                                                             |     |
|------------------|-------------------------------------------------------------|-----|
| wild type        | TQEVFAQVKQIYKTPPIKDFGGFNFSQILPDPSKPSKRSFIEDLLFNKVTLDAGFIKQY | 837 |
| DELTA            | TQEVFAQVKQIYKTPPIKDFGGFNFSQILPDPSKPSKRSFIEDLLFNKVTLDAGFIKQY | 835 |
| LAMBDA           | TQEVFAQVKQIYKTPPIKDFGGFNFSQILPDPSKPSKRSFIEDLLFNKVTLDAGFIKQY | 830 |
| MU               | TQEVFAQVKQIYKTPPIKDFGGFNFSQILPDPSKPSKRSFIEDLLFNKVTLDAGFIKQY | 838 |
| BETA             | TQEVFAQVKQIYKTPPIKDFGGFNFSQILPDPSKPSKRSFIEDLLFNKVTLDAGFIKQY | 834 |
| GAMMA            | TQEVFAQVKQIYKTPPIKDFGGFNFSQILPDPSKPSKRSFIEDLLFNKVTLDAGFIKQY | 837 |
| B.1.1.318        | TQEVFAQVKQIYKTPPIKDFGGFNFSQILPDPSKPSKRSFIEDLLFNKVTLDAGFIKQY | 836 |
| KAPPA            | TQEVFAQVKQIYKTPPIKDFGGFNFSQILPDPSKPSKRSFIEDLLFNKVTLDAGFIKQY | 837 |
| A 23.1           | TQEVFAQVKQIYKTPPIKDFGGFNFSQILPDPSKPSKRSFIEDLLFNKVTLDAGFIKQY | 837 |
| IOTA             | TQEVFAQVKQIYKTPPIKDFGGFNFSQILPDPSKPSKRSFIEDLLFNKVTLDAGFIKQY | 837 |
| THETA            | TQEVFAQVKQIYKTPPIKDFGGFNFSQILPDPSKPSKRSFIEDLLFNKVTLDAGFIKQY | 837 |
| EPSILON          | TQEVFAQVKQIYKTPPIKDFGGFNFSQILPDPSKPSKRSFIEDLLFNKVTLDAGFIKQY | 837 |
| 20 A.EU1         | TQEVFAQVKQIYKTPPIKDFGGFNFSQILPDPSKPSKRSFIEDLLFNKVTLDAGFIKQY | 837 |
| 20 A.EU2         | TQEVFAQVKQIYKTPPIKDFGGFNFSQILPDPSKPSKRSFIEDLLFNKVTLDAGFIKQY | 837 |
| ZETA             | TQEVFAQVKQIYKTPPIKDFGGFNFSQILPDPSKPSKRSFIEDLLFNKVTLDAGFIKQY | 837 |
| ALPHA            | TQEVFAQVKQIYKTPPIKDFGGFNFSQILPDPSKPSKRSFIEDLLFNKVTLDAGFIKQY | 834 |
| ETA              | TQEVFAQVKQIYKTPPIKDFGGFNFSQILPDPSKPSKRSFIEDLLFNKVTLDAGFIKQY | 834 |
| OmicronBA.1      | TQEVFAQVKQIYKTPPIKDFGGFNFSQILPDPSKPSKRSFIEDLLFNKVTLDAGFIKQY | 834 |
| OmicronBA.2      | TQEVFAQVKQIYKTPPIKDFGGFNFSQILPDPSKPSKRSFIEDLLFNKVTLDAGFIKQY | 834 |
| OmicronBA.2.12.1 | TQEVFAQVKQIYKTPPIKDFGGFNFSQILPDPSKPSKRSFIEDLLFNKVTLDAGFIKQY | 834 |
| OmicronBA.4      | TQEVFAQVKQIYKTPPIKDFGGFNFSQILPDPSKPSKRSFIEDLLFNKVTLDAGFIKQY | 832 |
| OmicronBA.5      | TQEVFAQVKQIYKTPPIKDFGGFNFSQILPDPSKPSKRSFIEDLLFNKVTLDAGFIKQY | 832 |
|                  | *****:*****                                                 |     |

|                   |                                                              |     |
|-------------------|--------------------------------------------------------------|-----|
| wild type         | GDCLGDIAARDLICAQKFNGTLVLPPLLTDEMIAQYTSALLAGTITSGWTFGAGAALQIP | 897 |
| DELTA             | GDCLGDIAARDLICAQKFNGTLVLPPLLTDEMIAQYTSALLAGTITSGWTFGAGAALQIP | 895 |
| LAMBDA            | GDCLGDIAARDLICAQKFNGTLVLPPLLTDEMIAQYTSALLAGTITSGWTFGAGAALQIP | 890 |
| MU                | GDCLGDIAARDLICAQKFNGTLVLPPLLTDEMIAQYTSALLAGTITSGWTFGAGAALQIP | 898 |
| BETA              | GDCLGDIAARDLICAQKFNGTLVLPPLLTDEMIAQYTSALLAGTITSGWTFGAGAALQIP | 894 |
| GAMMA             | GDCLGDIAARDLICAQKFNGTLVLPPLLTDEMIAQYTSALLAGTITSGWTFGAGAALQIP | 897 |
| B.1.1.318         | GDCLGDIAARDLICAQKFNGTLVLPPLLTDEMIAQYTSALLAGTITSGWTFGAGAALQIP | 896 |
| KAPPA             | GDCLGDIAARDLICAQKFNGTLVLPPLLTDEMIAQYTSALLAGTITSGWTFGAGAALQIP | 897 |
| A 23.1            | GDCLGDIAARDLICAQKFNGTLVLPPLLTDEMIAQYTSALLAGTITSGWTFGAGAALQIP | 897 |
| IOTA              | GDCLGDIAARDLICAQKFNGTLVLPPLLTDEMIAQYTSALLAGTITSGWTFGAGAALQIP | 897 |
| THETA             | GDCLGDIAARDLICAQKFNGTLVLPPLLTDEMIAQYTSALLAGTITSGWTFGAGAALQIP | 897 |
| EPSILON           | GDCLGDIAARDLICAQKFNGTLVLPPLLTDEMIAQYTSALLAGTITSGWTFGAGAALQIP | 897 |
| 20 A.EU1          | GDCLGDIAARDLICAQKFNGTLVLPPLLTDEMIAQYTSALLAGTITSGWTFGAGAALQIP | 897 |
| 20 A.EU2          | GDCLGDIAARDLICAQKFNGTLVLPPLLTDEMIAQYTSALLAGTITSGWTFGAGAALQIP | 897 |
| ZETA              | GDCLGDIAARDLICAQKFNGTLVLPPLLTDEMIAQYTSALLAGTITSGWTFGAGAALQIP | 897 |
| ALPHA             | GDCLGDIAARDLICAQKFNGTLVLPPLLTDEMIAQYTSALLAGTITSGWTFGAGAALQIP | 894 |
| ETA               | GDCLGDIAARDLICAQKFNGTLVLPPLLTDEMIAQYTSALLAGTITSGWTFGAGAALQIP | 894 |
| Omicron BA.1      | GDCLGDIAARDLICAQKFNGTLVLPPLLTDEMIAQYTSALLAGTITSGWTFGAGAALQIP | 894 |
| Omicron BA.2      | GDCLGDIAARDLICAQKFNGTLVLPPLLTDEMIAQYTSALLAGTITSGWTFGAGAALQIP | 894 |
| Omicron BA.2.12.1 | GDCLGDIAARDLICAQKFNGTLVLPPLLTDEMIAQYTSALLAGTITSGWTFGAGAALQIP | 894 |
| Omicron BA.4      | GDCLGDIAARDLICAQKFNGTLVLPPLLTDEMIAQYTSALLAGTITSGWTFGAGAALQIP | 892 |
| Omicron BA.5      | GDCLGDIAARDLICAQKFNGTLVLPPLLTDEMIAQYTSALLAGTITSGWTFGAGAALQIP | 892 |
|                   | *****:*****                                                  |     |

|                   |                                 |            |                     |     |
|-------------------|---------------------------------|------------|---------------------|-----|
| wild type         | FAMQMAYRFNGIGVTONVLYENQKLIANQFN | SAIGKIQDSL | SSTASALGKLQDVVNQNAQ | 957 |
| DELTA             | FAMQMAYRFNGIGVTONVLYENQKLIANQFN | SAIGKIQDSL | SSTASALGKLQNVVNQNAQ | 955 |
| LAMBDA            | FAMQMAYRFNGIGVTONVLYENQKLIANQFN | SAIGKIQDSL | SSTASALGKLQDVVNQNAQ | 950 |
| MU                | FAMQMAYRFNGIGVTONVLYENQKLIANQFN | SAIGKIQDSL | SSTASALGKLQNVVNQNAQ | 958 |
| BETA              | FAMQMAYRFNGIGVTONVLYENQKLIANQFN | SAIGKIQDSL | SSTASALGKLQDVVNQNAQ | 954 |
| GAMMA             | FAMQMAYRFNGIGVTONVLYENQKLIANQFN | SAIGKIQDSL | SSTASALGKLQDVVNQNAQ | 957 |
| B.1.1.318         | FAMQMAYRFNGIGVTONVLYENQKLIANQFN | SAIGKIQDSL | SSTASALGKLQDVVNQNAQ | 956 |
| KAPPA             | FAMQMAYRFNGIGVTONVLYENQKLIANQFN | SAIGKIQDSL | SSTASALGKLQDVVNQNAQ | 957 |
| A 23.1            | FAMQMAYRFNGIGVTONVLYENQKLIANQFN | SAIGKIQDSL | SSTASALGKLQDVVNQNAQ | 957 |
| IOTA              | FAMQMAYRFNGIGVTONVLYENQKLIANQFN | SAIGKIQDSL | SSTASALGKLQDVVNQNAQ | 957 |
| THETA             | FAMQMAYRFNGIGVTONVLYENQKLIANQFN | SAIGKIQDSL | SSTASALGKLQDVVNQNAQ | 957 |
| EPSILON           | FAMQMAYRFNGIGVTONVLYENQKLIANQFN | SAIGKIQDSL | SSTASALGKLQDVVNQNAQ | 957 |
| 20 A.EU1          | FAMQMAYRFNGIGVTONVLYENQKLIANQFN | SAIGKIQDSL | SSTASALGKLQDVVNQNAQ | 957 |
| 20 A.EU2          | FAMQMAYRFNGIGVTONVLYENQKLIANQFN | SAIGKIQDSL | SSTASALGKLQDVVNQNAQ | 957 |
| ZETA              | FAMQMAYRFNGIGVTONVLYENQKLIANQFN | SAIGKIQDSL | SSTASALGKLQDVVNQNAQ | 957 |
| ALPHA             | FAMQMAYRFNGIGVTONVLYENQKLIANQFN | SAIGKIQDSL | SSTASALGKLQDVVNQNAQ | 954 |
| ETA               | FAMQMAYRFNGIGVTONVLYENQKLIANQFN | SAIGKIQDSL | SSTASALGKLQDVVNQNAQ | 954 |
| Omicron BA.1      | FAMQMAYRFNGIGVTONVLYENQKLIANQFN | SAIGKIQDSL | SSTASALGKLQDVVNQNAQ | 954 |
| Omicron BA.2      | FAMQMAYRFNGIGVTONVLYENQKLIANQFN | SAIGKIQDSL | SSTASALGKLQDVVNQNAQ | 954 |
| Omicron BA.2.12.1 | FAMQMAYRFNGIGVTONVLYENQKLIANQFN | SAIGKIQDSL | SSTASALGKLQDVVNQNAQ | 954 |
| Omicron BA.4      | FAMQMAYRFNGIGVTONVLYENQKLIANQFN | SAIGKIQDSL | SSTASALGKLQDVVNQNAQ | 952 |
| Omicron BA.5      | FAMQMAYRFNGIGVTONVLYENQKLIANQFN | SAIGKIQDSL | SSTASALGKLQDVVNQNAQ | 952 |
|                   | *****                           | :          | ***                 | *** |

|                   |                 |             |                   |                   |      |
|-------------------|-----------------|-------------|-------------------|-------------------|------|
| wild type         | ALNTLVKQLSSNFGA | ISSVLNDILSR | LDKVEAEVQIDRLITGR | LQSLQTYVTQQLIRAAE | 1017 |
| DELTA             | ALNTLVKQLSSNFGA | ISSVLNDILSR | LDKVEAEVQIDRLITGR | LQSLQTYVTQQLIRAAE | 1015 |
| LAMBDA            | ALNTLVKQLSSNFGA | ISSVLNDILSR | LDKVEAEVQIDRLITGR | LQSLQTYVTQQLIRAAE | 1010 |
| MU                | ALNTLVKQLSSNFGA | ISSVLNDILSR | LDKVEAEVQIDRLITGR | LQSLQTYVTQQLIRAAE | 1018 |
| BETA              | ALNTLVKQLSSNFGA | ISSVLNDILSR | LDKVEAEVQIDRLITGR | LQSLQTYVTQQLIRAAE | 1014 |
| GAMMA             | ALNTLVKQLSSNFGA | ISSVLNDILSR | LDKVEAEVQIDRLITGR | LQSLQTYVTQQLIRAAE | 1017 |
| B.1.1.318         | ALNTLVKQLSSNFGA | ISSVLNDILSR | LDKVEAEVQIDRLITGR | LQSLQTYVTQQLIRAAE | 1016 |
| KAPPA             | ALNTLVKQLSSNFGA | ISSVLNDILSR | LDKVEAEVQIDRLITGR | LQSLQTYVTQQLIRAAE | 1017 |
| A 23.1            | ALNTLVKQLSSNFGA | ISSVLNDILSR | LDKVEAEVQIDRLITGR | LQSLQTYVTQQLIRAAE | 1017 |
| IOTA              | ALNTLVKQLSSNFGA | ISSVLNDILSR | LDKVEAEVQIDRLITGR | LQSLQTYVTQQLIRAAE | 1017 |
| THETA             | ALNTLVKQLSSNFGA | ISSVLNDILSR | LDKVEAEVQIDRLITGR | LQSLQTYVTQQLIRAAE | 1017 |
| EPSILON           | ALNTLVKQLSSNFGA | ISSVLNDILSR | LDKVEAEVQIDRLITGR | LQSLQTYVTQQLIRAAE | 1017 |
| 20 A.EU1          | ALNTLVKQLSSNFGA | ISSVLNDILSR | LDKVEAEVQIDRLITGR | LQSLQTYVTQQLIRAAE | 1017 |
| 20 A.EU2          | ALNTLVKQLSSNFGA | ISSVLNDILSR | LDKVEAEVQIDRLITGR | LQSLQTYVTQQLIRAAE | 1017 |
| ZETA              | ALNTLVKQLSSNFGA | ISSVLNDILSR | LDKVEAEVQIDRLITGR | LQSLQTYVTQQLIRAAE | 1017 |
| ALPHA             | ALNTLVKQLSSNFGA | ISSVLNDILSR | LDKVEAEVQIDRLITGR | LQSLQTYVTQQLIRAAE | 1014 |
| ETA               | ALNTLVKQLSSNFGA | ISSVLNDILSR | LDKVEAEVQIDRLITGR | LQSLQTYVTQQLIRAAE | 1014 |
| Omicron BA.1      | ALNTLVKQLSSNFGA | ISSVLNDILSR | LDKVEAEVQIDRLITGR | LQSLQTYVTQQLIRAAE | 1014 |
| Omicron BA.2      | ALNTLVKQLSSNFGA | ISSVLNDILSR | LDKVEAEVQIDRLITGR | LQSLQTYVTQQLIRAAE | 1014 |
| Omicron BA.2.12.1 | ALNTLVKQLSSNFGA | ISSVLNDILSR | LDKVEAEVQIDRLITGR | LQSLQTYVTQQLIRAAE | 1014 |
| Omicron BA.4      | ALNTLVKQLSSNFGA | ISSVLNDILSR | LDKVEAEVQIDRLITGR | LQSLQTYVTQQLIRAAE | 1012 |
| Omicron BA.5      | ALNTLVKQLSSNFGA | ISSVLNDILSR | LDKVEAEVQIDRLITGR | LQSLQTYVTQQLIRAAE | 1012 |
|                   | *****           | :           | *****             | *****             |      |

|                   |                                   |                         |       |      |
|-------------------|-----------------------------------|-------------------------|-------|------|
| wild type         | IRASANLAATKMSECVLGQSKRVDFCGKGYHLM | SFPQSAPHGVVFLHVTYVPAQEK | NFTT  | 1077 |
| DELTA             | IRASANLAATKMSECVLGQSKRVDFCGKGYHLM | SFPQSAPHGVVFLHVTYVPAQEK | NFTT  | 1075 |
| LAMBDA            | IRASANLAATKMSECVLGQSKRVDFCGKGYHLM | SFPQSAPHGVVFLHVTYVPAQEK | NFTT  | 1070 |
| MU                | IRASANLAATKMSECVLGQSKRVDFCGKGYHLM | SFPQSAPHGVVFLHVTYVPAQEK | NFTT  | 1078 |
| BETA              | IRASANLAATKMSECVLGQSKRVDFCGKGYHLM | SFPQSAPHGVVFLHVTYVPAQEK | NFTT  | 1074 |
| GAMMA             | IRASANLAATKMSECVLGQSKRVDFCGKGYHLM | SFPQSAPHGVVFLHVTYVPAQEK | NFTT  | 1077 |
| B.1.1.318         | IRASANLAATKMSECVLGQSKRVDFCGKGYHLM | SFPQSAPHGVVFLHVTYVPAQEK | NFTT  | 1076 |
| KAPPA             | IRASANLAATKMSECVLGQSKRVDFCGKGYHLM | SFPQSAPHGVVFLHVTYVPAQEK | NFTT  | 1077 |
| A 23.1            | IRASANLAATKMSECVLGQSKRVDFCGKGYHLM | SFPQSAPHGVVFLHVTYVPAQEK | NFTT  | 1077 |
| IOTA              | IRASANLAATKMSECVLGQSKRVDFCGKGYHLM | SFPQSAPHGVVFLHVTYVPAQEK | NFTT  | 1077 |
| THETA             | IRASANLAATKMSECVLGQSKRVDFCGKGYHLM | SFPQSAPHGVVFLHVTYVPAQEK | NFTT  | 1077 |
| EPSILON           | IRASANLAATKMSECVLGQSKRVDFCGKGYHLM | SFPQSAPHGVVFLHVTYVPAQEK | NFTT  | 1077 |
| 20 A.EU1          | IRASANLAATKMSECVLGQSKRVDFCGKGYHLM | SFPQSAPHGVVFLHVTYVPAQEK | NFTT  | 1077 |
| 20 A.EU2          | IRASANLAATKMSECVLGQSKRVDFCGKGYHLM | SFPQSAPHGVVFLHVTYVPAQEK | NFTT  | 1077 |
| ZETA              | IRASANLAATKMSECVLGQSKRVDFCGKGYHLM | SFPQSAPHGVVFLHVTYVPAQEK | NFTT  | 1077 |
| ALPHA             | IRASANLAATKMSECVLGQSKRVDFCGKGYHLM | SFPQSAPHGVVFLHVTYVPAQEK | NFTT  | 1074 |
| ETA               | IRASANLAATKMSECVLGQSKRVDFCGKGYHLM | SFPQSAPHGVVFLHVTYVPAQEK | NFTT  | 1074 |
| Omicron BA.1      | IRASANLAATKMSECVLGQSKRVDFCGKGYHLM | SFPQSAPHGVVFLHVTYVPAQEK | NFTT  | 1074 |
| Omicron BA.2      | IRASANLAATKMSECVLGQSKRVDFCGKGYHLM | SFPQSAPHGVVFLHVTYVPAQEK | NFTT  | 1074 |
| Omicron BA.2.12.1 | IRASANLAATKMSECVLGQSKRVDFCGKGYHLM | SFPQSAPHGVVFLHVTYVPAQEK | NFTT  | 1074 |
| Omicron BA.4      | IRASANLAATKMSECVLGQSKRVDFCGKGYHLM | SFPQSAPHGVVFLHVTYVPAQEK | NFTT  | 1072 |
| Omicron BA.5      | IRASANLAATKMSECVLGQSKRVDFCGKGYHLM | SFPQSAPHGVVFLHVTYVPAQEK | NFTT  | 1072 |
|                   | *****                             | :                       | ***** |      |

|                   |                                                              |      |
|-------------------|--------------------------------------------------------------|------|
| wild type         | APAICHDGKAHFPREGVFVSNGTHWFVTQRNFYEPQIIITDNTFVSGNCDVVIGIVNNTV | 1137 |
| DELTA             | APAICHDGKAHFPREGVFVSNGTHWFVTQRNFYEPQIIITDNTFVSGNCDVVIGIVNNTV | 1135 |
| LAMBDA            | APAICHDGKAHFPREGVFVSNGTHWFVTQRNFYEPQIIITDNTFVSGNCDVVIGIVNNTV | 1130 |
| MU                | APAICHDGKAHFPREGVFVSNGTHWFVTQRNFYEPQIIITDNTFVSGNCDVVIGIVNNTV | 1138 |
| BETA              | APAICHDGKAHFPREGVFVSNGTHWFVTQRNFYEPQIIITDNTFVSGNCDVVIGIVNNTV | 1134 |
| GAMMA             | APAICHDGKAHFPREGVFVSNGTHWFVTQRNFYEPQIIITDNTFVSGNCDVVIGIVNNTV | 1137 |
| B.1.1.318         | APAICHDGKAHFPREGVFVSNGTHWFVTQRNFYEPQIIITDNTFVSGNCDVVIGIVNNTV | 1136 |
| KAPPA             | APAICHDGKAHFPREGVFVSNGTDFVVTQRNFYEPQIIITDNTFVSGNCDVVIGIVNNTV | 1137 |
| A 23.1            | APAICHDGKAHFPREGVFVSNGTHWFVTQRNFYEPQIIITDNTFVSGNCDVVIGIVNNTV | 1137 |
| IOTA              | APAICHDGKAHFPREGVFVSNGTHWFVTQRNFYEPQIIITDNTFVSGNCDVVIGIVNNTV | 1137 |
| THETA             | APAICHDGKAHFPREGVFVSNGTWFVVTQRNFYEPQIIITDNTFVSGNCDVVIGIVNNTV | 1137 |
| EPSILON           | APAICHDGKAHFPREGVFVSNGTHWFVTQRNFYEPQIIITDNTFVSGNCDVVIGIVNNTV | 1137 |
| 20 A.EU1          | APAICHDGKAHFPREGVFVSNGTHWFVTQRNFYEPQIIITDNTFVSGNCDVVIGIVNNTV | 1137 |
| 20 A.EU2          | APAICHDGKAHFPREGVFVSNGTHWFVTQRNFYEPQIIITDNTFVSGNCDVVIGIVNNTV | 1137 |
| ZETA              | APAICHDGKAHFPREGVFVSNGTHWFVTQRNFYEPQIIITDNTFVSGNCDVVIGIVNNTV | 1137 |
| ALPHA             | APAICHDGKAHFPREGVFVSNGTHWFVTQRNFYEPQIIITDNTFVSGNCDVVIGIVNNTV | 1134 |
| ETA               | APAICHDGKAHFPREGVFVSNGTHWFVTQRNFYEPQIIITDNTFVSGNCDVVIGIVNNTV | 1134 |
| Omicron BA.1      | APAICHDGKAHFPREGVFVSNGTHWFVTQRNFYEPQIIITDNTFVSGNCDVVIGIVNNTV | 1134 |
| Omicron BA.2      | APAICHDGKAHFPREGVFVSNGTHWFVTQRNFYEPQIIITDNTFVSGNCDVVIGIVNNTV | 1134 |
| Omicron BA.2.12.1 | APAICHDGKAHFPREGVFVSNGTHWFVTQRNFYEPQIIITDNTFVSGNCDVVIGIVNNTV | 1134 |
| Omicron BA.4      | APAICHDGKAHFPREGVFVSNGTHWFVTQRNFYEPQIIITDNTFVSGNCDVVIGIVNNTV | 1132 |
| Omicron BA.5      | APAICHDGKAHFPREGVFVSNGTHWFVTQRNFYEPQIIITDNTFVSGNCDVVIGIVNNTV | 1132 |
|                   | *****.*****                                                  |      |

|                   |                                                              |      |
|-------------------|--------------------------------------------------------------|------|
| wild type         | YDPLQPELDSFKEELDKYFKNHTSPDVDLGDISGINASVVNIQKEIDRLNEVAKNLNESL | 1197 |
| DELTA             | YDPLQPELDSFKEELDKYFKNHTSPDVDLGDISGINASVVNIQKEIDRLNEVAKNLNESL | 1195 |
| LAMBDA            | YDPLQPELDSFKEELDKYFKNHTSPDVDLGDISGINASVVNIQKEIDRLNEVAKNLNESL | 1190 |
| MU                | YDPLQPELDSFKEELDKYFKNHTSPDVDLGDISGINASVVNIQKEIDRLNEVAKNLNESL | 1198 |
| BETA              | YDPLQPELDSFKEELDKYFKNHTSPDVDLGDISGINASVVNIQKEIDRLNEVAKNLNESL | 1194 |
| GAMMA             | YDPLQPELDSFKEELDKYFKNHTSPDVDLGDISGINASFVNIQKEIDRLNEVAKNLNESL | 1197 |
| B.1.1.318         | YDPLQPELDSFKEELDKYFKNHTSPDVDLGDISGINASVVNIQKEIDRLNEVAKNLNESL | 1196 |
| KAPPA             | YDPLQPELDSFKEELDKYFKNHTSPDVDLGDISGINASVVNIQKEIDRLNEVAKNLNESL | 1197 |
| A 23.1            | YDPLQPELDSFKEELDKYFKNHTSPDVDLGDISGINASVVNIQKEIDRLNEVAKNLNESL | 1197 |
| IOTA              | YDPLQPELDSFKEELDKYFKNHTSPDVDLGDISGINASVVNIQKEIDRLNEVAKNLNESL | 1197 |
| THETA             | YDPLQPELDSFKEELDKYFKNHTSPDVDLGDISGINASFVNIQKEIDRLNEVAKNLNESL | 1197 |
| EPSILON           | YDPLQPELDSFKEELDKYFKNHTSPDVDLGDISGINASVVNIQKEIDRLNEVAKNLNESL | 1197 |
| 20 A.EU1          | YDPLQPELDSFKEELDKYFKNHTSPDVDLGDISGINASVVNIQKEIDRLNEVAKNLNESL | 1197 |
| 20 A.EU2          | YDPLQPELDSFKEELDKYFKNHTSPDVDLGDISGINASVVNIQKEIDRLNEVAKNLNESL | 1197 |
| ZETA              | YDPLQPELDSFKEELDKYFKNHTSPDVDLGDISGINASFVNIQKEIDRLNEVAKNLNESL | 1197 |
| ALPHA             | YDPLQPELDSFKEELDKYFKNHTSPDVDLGDISGINASVVNIQKEIDRLNEVAKNLNESL | 1194 |
| ETA               | YDPLQPELDSFKEELDKYFKNHTSPDVDLGDISGINASVVNIQKEIDRLNEVAKNLNESL | 1194 |
| Omicron BA.1      | YDPLQPELDSFKEELDKYFKNHTSPDVDLGDISGINASVVNIQKEIDRLNEVAKNLNESL | 1194 |
| Omicron BA.2      | YDPLQPELDSFKEELDKYFKNHTSPDVDLGDISGINASVVNIQKEIDRLNEVAKNLNESL | 1194 |
| Omicron BA.2.12.1 | YDPLQPELDSFKEELDKYFKNHTSPDVDLGDISGINASVVNIQKEIDRLNEVAKNLNESL | 1194 |
| Omicron BA.4      | YDPLQPELDSFKEELDKYFKNHTSPDVDLGDISGINASVVNIQKEIDRLNEVAKNLNESL | 1192 |
| Omicron BA.5      | YDPLQPELDSFKEELDKYFKNHTSPDVDLGDISGINASVVNIQKEIDRLNEVAKNLNESL | 1192 |
|                   | *****.*****                                                  |      |

|                   |                                                             |      |
|-------------------|-------------------------------------------------------------|------|
| wild type         | IDLQELGKYEQYIKWPWYIWLGFIAGLIAIVMVTIMLCCMTSCCCLKGCCSCGSCCKFD | 1257 |
| DELTA             | IDLQELGKYEQYIKWPWYIWLGFIAGLIAIVMVTIMLCCMTSCCCLKGCCSCGSCCKFD | 1255 |
| LAMBDA            | IDLQELGKYEQYIKWPWYIWLGFIAGLIAIVMVTIMLCCMTSCCCLKGCCSCGSCCKFD | 1250 |
| MU                | IDLQELGKYEQYIKWPWYIWLGFIAGLIAIVMVTIMLCCMTSCCCLKGCCSCGSCCKFD | 1258 |
| BETA              | IDLQELGKYEQYIKWPWYIWLGFIAGLIAIVMVTIMLCCMTSCCCLKGCCSCGSCCKFD | 1254 |
| GAMMA             | IDLQELGKYEQYIKWPWYIWLGFIAGLIAIVMVTIMLCCMTSCCCLKGCCSCGSCCKFD | 1257 |
| B.1.1.318         | IDLQELGKYEQYIKWPWYIWLGFIAGLIAIVMVTIMLCCMTSCCCLKGCCSCGSCCKFD | 1256 |
| KAPPA             | IDLQELGKYEQYIKWPWYIWLGFIAGLIAIVMVTIMLCCMTSCCCLKGCCSCGSCCKFD | 1257 |
| A 23.1            | IDLQELGKYEQYIKWPWYIWLGFIAGLIAIVMVTIMLCCMTSCCCLKGCCSCGSCCKFD | 1257 |
| IOTA              | IDLQELGKYEQYIKWPWYIWLGFIAGLIAIVMVTIMLCCMTSCCCLKGCCSCGSCCKFD | 1257 |
| THETA             | IDLQELGKYEQYIKWPWYIWLGFIAGLIAIVMVTIMLCCMTSCCCLKGCCSCGSCCKFD | 1257 |
| EPSILON           | IDLQELGKYEQYIKWPWYIWLGFIAGLIAIVMVTIMLCCMTSCCCLKGCCSCGSCCKFD | 1257 |
| 20 A.EU1          | IDLQELGKYEQYIKWPWYIWLGFIAGLIAIVMVTIMLCCMTSCCCLKGCCSCGSCCKFD | 1257 |
| 20 A.EU2          | IDLQELGKYEQYIKWPWYIWLGFIAGLIAIVMVTIMLCCMTSCCCLKGCCSCGSCCKFD | 1257 |
| ZETA              | IDLQELGKYEQYIKWPWYIWLGFIAGLIAIVMVTIMLCCMTSCCCLKGCCSCGSCCKFD | 1257 |
| ALPHA             | IDLQELGKYEQYIKWPWYIWLGFIAGLIAIVMVTIMLCCMTSCCCLKGCCSCGSCCKFD | 1254 |
| ETA               | IDLQELGKYEQYIKWPWYIWLGFIAGLIAIVMVTIMLCCMTSCCCLKGCCSCGSCCKFD | 1254 |
| Omicron BA.1      | IDLQELGKYEQYIKWPWYIWLGFIAGLIAIVMVTIMLCCMTSCCCLKGCCSCGSCCKFD | 1254 |
| Omicron BA.2      | IDLQELGKYEQYIKWPWYIWLGFIAGLIAIVMVTIMLCCMTSCCCLKGCCSCGSCCKFD | 1254 |
| Omicron BA.2.12.1 | IDLQELGKYEQYIKWPWYIWLGFIAGLIAIVMVTIMLCCMTSCCCLKGCCSCGSCCKFD | 1254 |
| Omicron BA.4      | IDLQELGKYEQYIKWPWYIWLGFIAGLIAIVMVTIMLCCMTSCCCLKGCCSCGSCCKFD | 1252 |
| Omicron BA.5      | IDLQELGKYEQYIKWPWYIWLGFIAGLIAIVMVTIMLCCMTSCCCLKGCCSCGSCCKFD | 1252 |
|                   | *****                                                       |      |

|                   |                  |      |
|-------------------|------------------|------|
| wild type         | EDDSEPVLKGVKLHYT | 1273 |
| DELTA             | EDDSEPVLKGVKLHYT | 1271 |
| LAMBDA            | EDDSEPVLKGVKLHYT | 1266 |
| MU                | EDDSEPVLKGVKLHYT | 1274 |
| BETA              | EDDSEPVLKGVKLHYT | 1270 |
| GAMMA             | EDDSEPVLKGVKLHYT | 1273 |
| B.1.1.318         | EDDSEPVLKGVKLHYT | 1272 |
| KAPPA             | EDDSEPVLKGVKLHYT | 1273 |
| A 23.1            | EDDSEPVLKGVKLHYT | 1273 |
| IOTA              | EDDSEPVLKGVKLHYT | 1273 |
| THETA             | EDDSEPVLKGVKLHYT | 1273 |
| EPSILON           | EDDSEPVLKGVKLHYT | 1273 |
| 20 A.EU1          | EDDSEPVLKGVKLHYT | 1273 |
| 20 A.EU2          | EDDSEPVLKGVKLHYT | 1273 |
| ZETA              | EDDSEPVLKGVKLHYT | 1273 |
| ALPHA             | EDDSEPVLKGVKLHYT | 1270 |
| ETA               | EDDSEPVLKGVKLHYT | 1270 |
| Omicron BA.1      | EDDSEPVLKGVKLHYT | 1270 |
| Omicron BA.2      | EDDSEPVLKGVKLHYT | 1270 |
| Omicron BA.2.12.1 | EDDSEPVLKGVKLHYT | 1270 |
| Omicron BA.4      | EDDSEPVLKGVKLHYT | 1268 |
| Omicron BA.5      | EDDSEPVLKGVKLHYT | 1268 |

\*\*\*\*\*

**Figure S1. Sequences alignment.** SARS-CoV-2 wild type spike protein and its most diffused variants were aligned by using the Clustal Omega program (<https://www.ebi.ac.uk/Tools/msa/clustalo/>). The parameters used were used by default of the program. In yellow are underlined wild type residues with high rate of mutation. In red are underlined mutations present only in a single variant. In green are underlined mutations present only in all the Omicron variants. In cyan are underlined mutations present in all the Omicron variants excluding Omicron BA.1.
